# Supplementary material for: Asymptomatic Transmissibility Calls for Implementing a Zero-COVID Strategy to End the Current Global Crisis
Source: PubMed Central journal article supplement (PMC9062041; doi:10.3389/fcimb.2022.836409), 2022-04-19
Supplement: DataSheet_1.pdf [file DataSheet_1.pdf]

Supplementary S1-original data and references

|                            | Types of population               | Location of study            | Number of subjects           | Description of subjects                                                                                                 | Laboratory results | Number of asymptomatic subjects | Detection method             | Author                                 | Proportion of asymptomatic subjects | 95% Credible interval ( % ) |
|----------------------------|-----------------------------------|------------------------------|------------------------------|-------------------------------------------------------------------------------------------------------------------------|--------------------|---------------------------------|------------------------------|----------------------------------------|-------------------------------------|-----------------------------|
| SARS-CoV                   | General population                | Hong Kong of China           | 828                          | Healthy blood donors, Non-pneumonic adult patients, Non-pneumonic paediatric patients, Symptom-free health-care workers |                    | 4                               | ELISA                        | Woo, P.C <sup>1</sup>                  |                                     |                             |
|                            |                                   | Hong Kong of China           | 938                          | Healthy adults                                                                                                          |                    | 17                              | ELISA                        | Bo Jian Zheng <sup>2</sup>             |                                     |                             |
|                            |                                   | Hong Kong of China           | 12000                        | General population in a community stricken by SARS                                                                      |                    | 47                              | ELISA                        | D. T. M. Leung <sup>3</sup>            |                                     |                             |
|                            |                                   | Sum                          | 13766                        |                                                                                                                         |                    | 68                              |                              |                                        | 0.49% ( 68/13766 )                  | [0.39, 0.63]                |
|                            |                                   |                              |                              |                                                                                                                         |                    |                                 |                              |                                        |                                     |                             |
|                            | Contacts of confirmed cases       | Guang Zhou of China          | 115                          | Contacts of confirmed cases                                                                                             |                    | 1                               | ELISA                        | Che, X. Y. <sup>4</sup>                |                                     |                             |
|                            |                                   | Hong Kong of China           | 1068                         |                                                                                                                         |                    | 2                               | ELISA                        | GM Leung <sup>5</sup>                  |                                     |                             |
|                            |                                   | France                       | 37                           |                                                                                                                         |                    | 0                               | ELISA                        | Le Vu, S <sup>6</sup>                  |                                     |                             |
|                            |                                   | Sum                          | 1220                         |                                                                                                                         |                    | 3                               |                              |                                        | 0.25% ( 3/1220 )                    | [0.06, 0.78]                |
|                            | HCWs                              | Hong Kong of China           | 131                          | HCWs                                                                                                                    |                    | 3                               | ELISA                        | Ip, M. <sup>7</sup>                    |                                     |                             |
|                            |                                   | Hong Kong of China           | 101                          | HCWs                                                                                                                    |                    | 1                               | ELISA                        | Lee, H. K. <sup>8</sup>                |                                     |                             |
|                            |                                   | Taiwan of China              | 193                          | HCWs                                                                                                                    |                    | 1                               | ELISA                        | Wei-Tien Chang <sup>9</sup>            |                                     |                             |
|                            |                                   | Hong Kong of China           | 647                          | HCWs                                                                                                                    |                    | 0                               | ELISA                        | Chan, P. K. <sup>10</sup>              |                                     |                             |
|                            |                                   | Hong Kong of China           | 668                          | HCWs                                                                                                                    |                    | 1                               | ELISA                        | Lai, T. S. <sup>11</sup>               |                                     |                             |
|                            |                                   | Taiwan of China              | 433                          | HCWs                                                                                                                    |                    | 4                               | ELISA                        | Hsueh, P. R. <sup>12</sup>             |                                     |                             |
|                            |                                   | Singapore                    | 80                           | HCWs                                                                                                                    |                    | 6                               | ELISA                        | Wilder-Smith, A. <sup>13</sup>         |                                     |                             |
|                            |                                   | Bei jin of China             | 1127                         | HCWs                                                                                                                    |                    | 29                              | ELISA                        | Wang, Z. H. <sup>14</sup>              |                                     |                             |
| Guang Zhou of China        |                                   | 137                          | HCWs                         |                                                                                                                         | 4                  | ELISA                           | CDC; D Yu, MD <sup>15</sup>  |                                        |                                     |                             |
| Sum                        |                                   | 3544                         |                              |                                                                                                                         | 49                 | ELISA                           |                              | 1.38% (49/3544)                        | [1.04, 1.84]                        |                             |
| MERS-CoV                   | Occupational exposure to the host | Qatar                        | 294                          | Occupational contact with dromedary camels                                                                              | 10                 | 10                              | ELISA                        | Reusken, C. B. <sup>16</sup>           |                                     |                             |
|                            |                                   | Kenya                        | 1222                         | Livestock herders                                                                                                       | 2                  | 2                               | ELISA                        | Liljander, A. <sup>17</sup>            |                                     |                             |
|                            |                                   | Sum                          | 1516                         |                                                                                                                         |                    | 12                              |                              |                                        | 0.79% (12/1516)                     | [0.43, 1.42]                |
|                            | General population                | Western part of Saudi Arabia | 7461                         | Healthy adult blood donors                                                                                              |                    | 17                              | ELISA                        | Degnah A.A. <sup>18</sup>              |                                     |                             |
|                            |                                   | Saudi Arabia                 | 10009                        | Healthy individuals                                                                                                     |                    | 15                              | ELISA                        | Muller, M. A. <sup>19</sup>            |                                     |                             |
|                            |                                   | Qatar                        | 4719                         | Healthy blood donors                                                                                                    |                    | 1                               | ELISA                        | Al Kahlout, R. A. <sup>20</sup>        |                                     |                             |
|                            |                                   | Sum                          | 21649                        |                                                                                                                         |                    | 33                              |                              |                                        | 0.15%(33/21649)                     | [0.11, 0.22]                |
|                            | Contacts of confirmed cases       | United Kingdom               | 33                           | Contacts of a confirmed case                                                                                            | 2                  | 0                               | rRT-PCR                      | Health Protection Agency <sup>21</sup> |                                     |                             |
|                            |                                   | France                       | 162                          | Contacts of a confirmed case                                                                                            | 1                  | 0                               | rRT-PCR                      | Mailles, A. <sup>22</sup>              |                                     |                             |
|                            |                                   | KSA                          | 79                           | Contacts of a confirmed case                                                                                            | 11                 | 2                               | rRT-PCR                      | Arwady, M. A. <sup>23</sup>            |                                     |                             |
|                            |                                   | United Arab Emirates         | 124                          | Contacts of a confirmed case                                                                                            | 13                 | 3                               | ELISA                        | Al Hosani, F. I. <sup>24</sup>         |                                     |                             |
|                            |                                   | Qatar                        | 135                          | Contacts of a confirmed case                                                                                            |                    | 1                               | ELISA                        | Al Kahlout, R. A. <sup>20</sup>        |                                     |                             |
|                            |                                   | Korea                        | 1610                         | Contacts of a confirmed case                                                                                            |                    | 7                               | ELISA                        | Yeong-Jun Song <sup>25</sup>           |                                     |                             |
|                            |                                   | Sum                          | 2143                         |                                                                                                                         |                    |                                 | 13                           |                                        |                                     | 0.61% (13/2143)             |
|                            | Confirmed suspected cases         | United Arab Emirates         | 1586                         | Suspected MERS case patients                                                                                            | 65                 | 23                              | rRT-PCR                      | Al Hosani, F. I. <sup>26</sup>         |                                     |                             |
|                            |                                   | KSA                          | 57363                        | Suspected MERS case patients                                                                                            | 384                | 19                              | rRT-PCR                      | Saeed, A. A. <sup>27</sup>             |                                     |                             |
|                            |                                   | Sum                          |                              |                                                                                                                         | 449                | 42                              |                              |                                        | 9.35% (42/449)                      | [6.90, 12.53]               |
| Laboratory confirmed cases | KSA                               |                              | Confirmed MERS-CoV infection | 255                                                                                                                     | 64                 | rRT-PCR                         | Oboho, I. K. <sup>28</sup>   |                                        |                                     |                             |
|                            | KSA                               |                              | Confirmed MERS-CoV infection | 38                                                                                                                      | 2                  | rRT-PCR,ELISA                   | Assiri, A. <sup>29</sup>     |                                        |                                     |                             |
|                            | KSA                               |                              | Patient-contacts in hospital | 61                                                                                                                      | 3                  | rRT-PCR                         | Alenazi, T. H. <sup>30</sup> |                                        |                                     |                             |
|                            | KSA                               |                              | MERS survivors               | 18                                                                                                                      | 3                  | rRT-PCR,ELISA                   | Zhao, J. <sup>31</sup>       |                                        |                                     |                             |
|                            | Jordan                            |                              | Patient-contacts in hospital | 16                                                                                                                      | 3                  | rRT-PCR,ELISA                   | Payne, D. C. <sup>32</sup>   |                                        |                                     |                             |
|                            |                                   |                              | Confirmed MERS-CoV infection | 144                                                                                                                     | 18                 |                                 | WHO <sup>33</sup>            |                                        |                                     |                             |

|                                |                      |      |                                         |     |     |                   |                                 |                   |                 |
|--------------------------------|----------------------|------|-----------------------------------------|-----|-----|-------------------|---------------------------------|-------------------|-----------------|
|                                | Sum                  |      |                                         | 532 | 93  |                   |                                 | 17.48% (93/532)   | [14.40, 21.04]  |
| Confirmed HCWs                 | KSA                  |      | HCWs                                    | 18  | 6   | rRT-PCR,ELISA,IFA | Alshukairi, A. N. <sup>34</sup> |                   |                 |
|                                | KSA                  |      | HCWs                                    | 7   | 4   | rRT-PCR,ELISA,IFA | Assiri, A. <sup>29</sup>        |                   |                 |
|                                | KSA                  |      | HCWs                                    | 43  | 25  | rRT-PCR           | Balkhy, H. H. <sup>35</sup>     |                   |                 |
|                                | United Arab Emirates |      | HCWs                                    | 31  | 12  | rRT-PCR           | Al Hosani, F. I. <sup>26</sup>  |                   |                 |
|                                | KSA                  |      | HCWs                                    | 43  | 18  | rRT-PCR           | Alenazi, T. H. <sup>30</sup>    |                   |                 |
|                                | Riyadh               |      | HCWs                                    | 15  | 8   | rRT-PCR           | Amer, H. <sup>36</sup>          |                   |                 |
|                                | Global               |      | HCWs                                    | 389 | 94  |                   | Grant, R. <sup>37</sup>         |                   |                 |
|                                | Sum                  |      |                                         | 546 | 167 |                   |                                 | 30.5% (167/546 )  | [26.78 , 34.67] |
| WHO-Laboratory confirmed cases |                      | 2274 | Laboratory confirmed MERS-CoV infection |     | 298 |                   | Grant, R. <sup>37</sup>         |                   |                 |
|                                |                      | 642  | Laboratory confirmed MERS-CoV infection |     | 35  |                   | Elkholy, A. A. <sup>38</sup>    |                   |                 |
|                                | Sum                  | 2916 |                                         |     | 333 |                   |                                 | 11.42% (333/2916) | [10.30, 12.64]  |
| WHO-Confirmed HCWs             |                      |      |                                         | 338 | 89  |                   | Elkholy, A. A. <sup>38</sup>    |                   |                 |
|                                |                      | 2223 | HCWs                                    | 414 | 164 |                   | Grant, R. <sup>37</sup>         |                   |                 |
|                                | Sum                  |      |                                         | 752 | 253 |                   |                                 | 33.64% (253/752)  | [30.29, 37.16]  |

| Types of population                   | Location of study         | Number of subjects | Description of subjects            | Laboratory results | Number of asymptomatic subjects | Detection method | Author                             | Proportion of asymptomatic subjects |                |
|---------------------------------------|---------------------------|--------------------|------------------------------------|--------------------|---------------------------------|------------------|------------------------------------|-------------------------------------|----------------|
| Other countries/areas                 | Japan                     | 565                | Evacuated population from China    | 9                  | 5                               | rRT-PCR          | Update to 2020-02-01 <sup>39</sup> | 55.56% (5/565 )                     |                |
|                                       | Korea                     | 701                | Evacuated population from China    | 2                  | 0                               | rRT-PCR          | Update to 2020-02-04 <sup>40</sup> | 0                                   |                |
|                                       | Germany                   | 114                | Evacuated population from China    | 2                  | 1                               | rRT-PCR          | Update to 2020-02-02 <sup>41</sup> | 0                                   |                |
|                                       | Singapore                 | 92                 | Evacuated population from China    | 4                  | 2                               | rRT-PCR          | Update to 2020-02-10 <sup>42</sup> | 50.00%(2/4)                         |                |
|                                       | France                    | 434                | Evacuated population from China    | 0                  | 0                               | rRT-PCR          | Update to 2020-02-08 <sup>43</sup> | 0                                   |                |
|                                       | Iceland                   | 2283               | Random-Sample Population Screening | 13                 | 7                               | rRT-PCR          | Update to 2020-04-04 <sup>44</sup> |                                     |                |
|                                       | Sum                       | 4189               |                                    | 30                 | 15                              |                  |                                    | 0.36%(15/4189)                      | [0.21, 0.60]   |
| Other countries/areas                 | Japan                     | 565                | Evacuated population from China    | 9                  | 5                               | rRT-PCR          | Update to 2020-02-01 <sup>39</sup> | 55.56% (5/9 )                       |                |
|                                       | South Korea               | 701                | Evacuated population from China    | 2                  | 0                               | rRT-PCR          | Update to 2020-02-04 <sup>40</sup> | 0                                   |                |
|                                       | Germany                   | 114                | Evacuated population from China    | 2                  | 1                               | rRT-PCR          | Update to 2020-02-02 <sup>41</sup> | 0                                   |                |
|                                       | Singapore                 | 92                 | Evacuated population from China    | 4                  | 2                               | rRT-PCR          | Update to 2020-02-10 <sup>42</sup> | 50.00%(2/4)                         |                |
|                                       | France                    | 434                | Evacuated population from China    | 0                  | 0                               | rRT-PCR          | Update to 2020-02-08 <sup>43</sup> | 0                                   |                |
|                                       | Sum                       | 1916               |                                    | 17                 | 8                               |                  |                                    | 47.06%(8/17)                        | [23.86, 71.47] |
| Diamond Princess                      | Diamond Princess cruise   | 4061               | Confirmed cases                    | 705                | 392                             | rRT-PCR          | Update to 2020-02-15 <sup>45</sup> | 55.60%(392/705 )                    |                |
|                                       | Sum                       | 4061               |                                    | 705                | 392                             |                  |                                    | 55.60%(392/705 )                    | [51.84, 59.30] |
| Contacts of confirmed cases           | Ningbo of China           | 2147               | Contacts of confirmed cases        | 110                | 22                              | rRT-PCR          | Update to 2020-03-06 <sup>46</sup> |                                     |                |
|                                       | Jinan of China            | 1455               | Contacts of confirmed cases        | 28                 | 3                               | rRT-PCR          | Update to 2020-03-01 <sup>47</sup> |                                     |                |
|                                       | Hubei partial areas of Ch | 738                | Contacts of confirmed cases        | 70                 | 28                              | rRT-PCR          | Update to 2020-02-23 <sup>48</sup> |                                     |                |
|                                       | Total                     | 4340               |                                    | 208                | 53                              | rRT-PCR          |                                    | 1.22% (61/4304)                     | [1.09, 1.83]   |
| Partial areas of China(Screening)     | Ningbo of China           | 2147               | Contacts of confirmed cases        | 110                | 22                              | rRT-PCR          | Update to 2020-03-06 <sup>46</sup> |                                     |                |
|                                       | Jinan of China            | 1455               | Contacts of confirmed cases        | 28                 | 3                               | rRT-PCR          | Update to 2020-03-01 <sup>47</sup> |                                     |                |
|                                       | Hubei partial areas of Ch | 738                | Contacts of confirmed cases        | 70                 | 28                              | rRT-PCR          | Update to 2020-02-23 <sup>48</sup> |                                     |                |
|                                       | Total                     | 4340               |                                    | 208                | 53                              | rRT-PCR          |                                    | 21.11% (61/289)                     | [16.64, 26.36] |
| Confirmed cases                       | Iceland                   | 22279              | Targeted Testing                   | 1321               | 126                             |                  | Update to 2020-04-04 <sup>44</sup> | 9.54(126/1321)                      | [8.03, 11.28]  |
| Early stage of China                  | He Nan of China           |                    | Confirmed cases                    | 168                | 2                               | rRT-PCR          | Update to 2020-01-24 <sup>49</sup> | 1.19% (2/168 )                      | [0.21,4.68]    |
|                                       | Zhe Jiang of China        |                    | Confirmed cases                    | 85                 | 1                               | rRT-PCR          | Update to 2020-01-29 <sup>50</sup> | 1.18% (1/85)                        | [0.06, 7.23]   |
|                                       | Shan Xi of China          |                    | Confirmed cases                    | 87                 | 1                               | rRT-PCR          | Update to 2020-01-30 <sup>51</sup> | 1.15% (1/87 )                       | [0.06, 7.13]   |
|                                       | Total                     |                    |                                    | 340                | 4                               |                  |                                    | 1.18%(4/340)                        | [0.38, 3.19]   |
| Shan Dong of China(Partial screening) | Shan Dong of China        |                    | Confirmed cases                    | 246                | 14                              | rRT-PCR          | Update to 2020-02-02 <sup>52</sup> | 5.69% (14/246)                      | [3.27, 9.57]   |

COVID-19

|                                                              |                  |       |                             |       |      |         |                                    |                    |                |
|--------------------------------------------------------------|------------------|-------|-----------------------------|-------|------|---------|------------------------------------|--------------------|----------------|
| Confirmed cases                                              | Ning bo of China | 2147  | Confirmed cases             | 191   | 30   | rRT-PCR | Update to 2020-02-02 <sup>46</sup> | 15.71%(30/191)     | [11.01, 21.83] |
| Confirmed cases                                              | Ning bo of China | 2147  | Contacts of confirmed cases | 110   | 22   | rRT-PCR | Update to 2020-02-02 <sup>46</sup> | 1.02%(22/2147)     | [0.66, 0.157]  |
| Confirmed cases<br>Contacts with asymptomatic infected cases | Ning bo of China | 146   | Confirmed cases             | 6     |      | rRT-PCR | Update to 2020-02-02 <sup>46</sup> |                    |                |
| Middle stage of China(cumulative data)                       | China            | 72341 | Patient records             | 44627 | 889  | rRT-PCR | Update to 2020-02-12 <sup>53</sup> | 1.99% (889/44627)  | [1.87, 2.13]   |
| Late stage of China(cumulative data)                         | China            | 82295 |                             | 82295 | 6176 |         | Update to 2020-04-14 <sup>54</sup> | 7.50% (6176/82295) | [7.32, 7.69]   |
| Imported cases                                               |                  | 1500  | Imported cases              | 1500  | 337  | rRT-PCR | Update to 2020-04-14 <sup>55</sup> | 22.47%(337/1500)   | [20.39, 24.68] |

Health care workers (HCWs); Enzyme-linked immunosorbent assay (ELISA); Real time Reverse Transcription-Polymerase Chain Reaction (rRT-PCR); Immunofluorescence assay (IFA); Kingdom of Saudi Arabia (KSA); WHO, world health organization

- Woo PC, Lau SK, Tsoi HW, et al. Relative rates of non-pneumonic SARS coronavirus infection and SARS coronavirus pneumonia. *Lancet* 2004; 363(9412): 841-5.
- Zheng BJ, Wong KH, Zhou J, et al. SARS-related virus predating SARS outbreak, Hong Kong. *Emerg Infect Dis* 2004; 10(2): 176-8.
- Yeung DT, van Maren WW, Chan FK, et al. Extremely low exposure of a community to severe acute respiratory syndrome coronavirus: false seropositivity due to use of bacterially derived antigens. *J Virol* 2006; 80(18): 8920-8.
- Ye XY, Di B, Zhao GP, et al. A patient with asymptomatic severe acute respiratory syndrome (SARS) and antigenemia from the 2003-2004 community outbreak of SARS in Guangzhou, China. *Clin Infect Dis* 2006; 43(1): e1-5.
- Yeung GM, Ho LM, Lam TH, Hedley AJ, Peiris JS. Prevalence of SARS-CoV antibody in all Hong Kong patient contacts. *Hong Kong Med J* 2009; 15 Suppl 9: 27-9.
- Ye Vu S, Yazdanpanah Y, Bitar D, Emmanuelli J, Bonmarin I, Desenclos JC. Absence of infection in asymptomatic contacts of index SARS case in France. *Euro Surveill* 2006; 11(1): 9-10.
- Ye M, Chan PK, Lee N, et al. Seroprevalence of antibody to severe acute respiratory syndrome (SARS)-associated coronavirus among health care workers in SARS and non-SARS medical wards. *Clin Infect Dis* 2004; 38(12): e116-8.
- Ye HK, Tso EY, Chau TN, Tsang OT, Choi KW, Lai TS. Asymptomatic severe acute respiratory syndrome-associated coronavirus infection. *Emerg Infect Dis* 2003; 9(11): 1491-2.
- Yeung WT, Kao CL, Chung MY, et al. SARS exposure and emergency department workers. *Emerg Infect Dis* 2004; 10(6): 1117-9.
- Yeung PK, Ip M, Ng KC, et al. Severe acute respiratory syndrome-associated coronavirus infection. *Emerg Infect Dis* 2003; 9(11): 1453-4.
- Ye TS, Keung Ng T, Seto WH, Yam L, Law KI, Chan J. Low prevalence of subclinical severe acute respiratory syndrome-associated coronavirus infection among hospital healthcare workers in Hong Kong. *Scand J Infect Dis* 2005; 37(6-7): 500-3.
- Yeueh PR, Kao CL, Lee CN, et al. SARS antibody test for serosurveillance. *Emerg Infect Dis* 2004; 10(9): 1558-62.
- Yeilder-Smith A, Teleman MD, Heng BH, Earnest A, Ling AE, Leo YS. Asymptomatic SARS coronavirus infection among healthcare workers, Singapore. *Emerg Infect Dis* 2005; 11(7): 1142-5.
- Yeung ZH, Nong Y, Lin JT, et al. [Covert infection of severe acute respiratory syndrome in health-care professionals and its relation to the workload and the type of work]. *Zhonghua Jie He He Hu Xi Za Zhi* 2004; 27(3): 151-4.
- Ye Yu M, H Li, R Xu, MPH, J He, J Lin, L Li, W Li, H Xu, S Huang, J Huang. Prevalence of IgG Antibody to SARS-Associated Coronavirus in Animal Traders --- Guangdong Province, China, 2003. *Guangdong Center for Disease Control* 2003: <https://www.cdc.gov/mmwr/preview/mmwrhtml/mms241a2.htm>.
- Yeusken CB, Farag EA, Haagmans BL, et al. Occupational Exposure to Dromedaries and Risk for MERS-CoV Infection, Qatar, 2013-2014. *Emerg Infect Dis* 2015; 21(8): 1422-5.
- Yeiljander A, Meyer B, Jores J, et al. MERS-CoV Antibodies in Humans, Africa, 2013-2014. *Emerg Infect Dis* 2016; 22(6): 1086-9.
- Yeegnah AA, Al-Amri SS, Hassan AM, et al. Seroprevalence of MERS-CoV in healthy adults in western Saudi Arabia, 2011-2016. *J Infect Public Health* 2020.
- Ye Muller MA, Meyer B, Corman VM, et al. Presence of Middle East respiratory syndrome coronavirus antibodies in Saudi Arabia: a nationwide, cross-sectional, serological study. *Lancet Infect Dis* 2015; 15(6): 629.
- Ye Kahlout RA, Nasrallah GK, Farag EA, et al. Comparative Serological Study for the Prevalence of Anti-MERS Coronavirus Antibodies in High- and Low-Risk Groups in Qatar. *J Immunol Res* 2019; 2019: 1386740.
- Ye Health Protection Agency UKNCIt. Evidence of person-to-person transmission within a family cluster of novel coronavirus infections, United Kingdom, February 2013. *Euro Surveill* 2013; 18(11): 20427.
- Ye Mailles A, Blanckaert K, Chaud P, et al. First cases of Middle East Respiratory Syndrome Coronavirus (MERS-CoV) infections in France, investigations and implications for the prevention of human-to-human transmission, France, May 2013. *Euro Surveill* 2013; 18(24).
- Ye Arwady MA, Alraddadi B, Basler C, et al. Middle East Respiratory Syndrome Coronavirus Transmission in Extended Family, Saudi Arabia, 2014. *Emerg Infect Dis* 2016; 22(8): 1395-402.
- Ye Hosani FI, Kim L, Khudhair A, et al. Serologic Follow-up of Middle East Respiratory Syndrome Coronavirus Cases and Contacts-Abu Dhabi, United Arab Emirates. *Clin Infect Dis* 2019; 68(3): 409-18.
- Ye Song YJ, Yang JS, Yoon HJ, et al. Asymptomatic Middle East Respiratory Syndrome coronavirus infection using a serologic survey in Korea. *Epidemiol Health* 2018; 40: e2018014.
- Ye Hosani FI, Pringle K, Al Mulla M, et al. Response to Emergence of Middle East Respiratory Syndrome Coronavirus, Abu Dhabi, United Arab Emirates, 2013-2014. *Emerg Infect Dis* 2016; 22(7): 1162-8.
- Ye Saeed AA, Abedi GR, Alzahrani AG, et al. Surveillance and Testing for Middle East Respiratory Syndrome Coronavirus, Saudi Arabia, April 2015-February 2016. *Emerg Infect Dis* 2017; 23(4): 682-5.
- Ye Boho IK, Tomczyk SM, Al-Asmari AM, et al. 2014 MERS-CoV outbreak in Jeddah--a link to health care facilities. *N Engl J Med* 2015; 372(9): 846-54.
- Ye Assiri A, Abedi GR, Bin Saeed AA, et al. Multifacility Outbreak of Middle East Respiratory Syndrome in Taif, Saudi Arabia. *Emerg Infect Dis* 2016; 22(1): 32-40.
- Ye Alenazi TH, Al Arbash H, El-Saed A, et al. Identified Transmission Dynamics of Middle East Respiratory Syndrome Coronavirus Infection During an Outbreak: Implications of an Overcrowded Emergency Department. *Clin Infect Dis* 2017; 65(4): 675-9.
- Ye Zhao J, Alshukairi AN, Baharoon SA, et al. Recovery from the Middle East respiratory syndrome is associated with antibody and T-cell responses. *Sci Immunol* 2017; 2(14).
- Ye Payne DC, Biggs HM, Al-Abdallat MM, et al. Multihospital Outbreak of a Middle East Respiratory Syndrome Coronavirus Deletion Variant, Jordan: A Molecular, Serologic, and Epidemiologic Investigation. *Open Forum Infect Dis* 2018; 5(5): ofy095.
- Ye Who Mers-Cov Research G. State of Knowledge and Data Gaps of Middle East Respiratory Syndrome Coronavirus (MERS-CoV) in Humans. *PLoS Curr* 2013; 5.
- Ye Alshukairi AN, Khalid I, Ahmed WA, et al. Antibody Response and Disease Severity in Healthcare Worker MERS Survivors. *Emerg Infect Dis* 2016; 22(6).
- Ye Balkhy HH, Alenazi TH, Alshamrani MM, et al. Description of a Hospital Outbreak of Middle East Respiratory Syndrome in a Large Tertiary Care Hospital in Saudi Arabia. *Infect Control Hosp Epidemiol* 2016; 37(10): 1147-55.
- Ye Amer H, Alqatani AS, Alaklobi F, Altayeb J, Memish ZA. Healthcare worker exposure to Middle East respiratory syndrome coronavirus (MERS-CoV): Revision of screening strategies urgently needed. *Int J Infect Dis* 2018; 71: 113-6.
- Ye Grant R, Malik MR, Elkholy A, Van Kerkhove MD. A review of asymptomatic and sub-clinical Middle East Respiratory Syndrome Coronavirus Infections. *Epidemiol Rev* 2019.
- Ye Elkholy AA, Grant R, Assiri A, Elhakim M, Malik MR, Van Kerkhove MD. MERS-CoV infection among healthcare workers and risk factors for death: Retrospective analysis of all laboratory-confirmed cases reported to WHO from 2012 to 2 June 2018. *J Infect Public Health* 2019.
- Ye Michiura H, Kobayashi T, Yang Y, et al. The Rate of Underascertainment of Novel Coronavirus (2019-nCoV) Infection: Estimation Using Japanese Passenger Data on Evacuation Flights. *J Clin Med* 2020; 9(2).

39. Ishimura H, Kobayashi T, Tang T, et al. The rate of underascertainment of novel coronavirus (2019-nCoV) infection: Estimation using Japanese passengers data on evacuation flights. *J Clin Virol* 2020; 9(2).

40. Dooperation DoRaal. Enhanced the 2019-nCoV quarantine guideline in Republic of Korea. 2020-02-03 2020: [https://www.cdc.go.kr/board/board.es?mid=a30402000000&bid=0030&tag=&act=view&list\\_no=365953](https://www.cdc.go.kr/board/board.es?mid=a30402000000&bid=0030&tag=&act=view&list_no=365953).

41. Boehl S, Berger A, Kortenbusch M, et al. Evidence of SARS-CoV-2 Infection in Returning Travelers from Wuhan, China. *N Engl J Med* 2020.

42. Network TST-An. Coronavirus: All 92 evacuated from Wuhan on Scoot flight being tested. <https://asianewsnetwork/2020/02/10/coronavirus-in-singapore-of-the-43-cases-so-far-26-are-male-17-female-local-cases-now-exceed-imported-ones/> 2020-02-10.

43. News Y. Coronavirus tests on two French citizens evacuated from China turn out negative. Coronavirus: French evacuees from China test negative for virus. [https://uknewsyahoocom/plane-carrying-french-citizens-virus-123813390.html?guccounter=1&guce\\_referrer=aHR0cHM6Ly9jb25iaW5nLmNvbS8&guce\\_referrer\\_sig=AQAAAKYTYbyq2KdaFzo\\_-3lLtoPYPI\\_es\\_PwDz3dUP4PbJArIqQ2W5pQ22bQTij\\_NAEHIU887ftQUspq1-x6CzGN3t0yUywrVdCRP6Lff6iDkp3wl\\_MDCGdyDSB3YXbYcb2WKO4bhMRkPxr60\\_ZdnfPfdLzLnqQ0m\\_dJs6eWbJ5x-ta](https://uknewsyahoocom/plane-carrying-french-citizens-virus-123813390.html?guccounter=1&guce_referrer=aHR0cHM6Ly9jb25iaW5nLmNvbS8&guce_referrer_sig=AQAAAKYTYbyq2KdaFzo_-3lLtoPYPI_es_PwDz3dUP4PbJArIqQ2W5pQ22bQTij_NAEHIU887ftQUspq1-x6CzGN3t0yUywrVdCRP6Lff6iDkp3wl_MDCGdyDSB3YXbYcb2WKO4bhMRkPxr60_ZdnfPfdLzLnqQ0m_dJs6eWbJ5x-ta) 2020-01-31.

44. Gudbjartsson DF, Helgason A, Jonsson H, et al. Spread of SARS-CoV-2 in the Icelandic Population. *N Engl J Med* 2020.

45. News S. COVID Confirmed Cases On Diamond Princess Increases to 705. <https://recombinomicsco/topic/4973-covid-confirmed-cases-on-diamond-princess-increases-to-705/> 2020-01-16.

46. Chen Yi WA, Yi Bo, Ding Kejin, Wang Haibo, Wang Jianmei, Shi Hongbo, Wang Sijia, Xu, Guozhang. The epidemiological characteristics of infection in close contacts of COVID-19 in Ningbo city. *Chinese Journal of Epidemiology* 2020; 41(41): 1-7.
